# Supplementary material
Source: PubMed Central journal article supplement (PMC5621948)

Appendix 2 (as supplied by the authors): Tornado diagrams

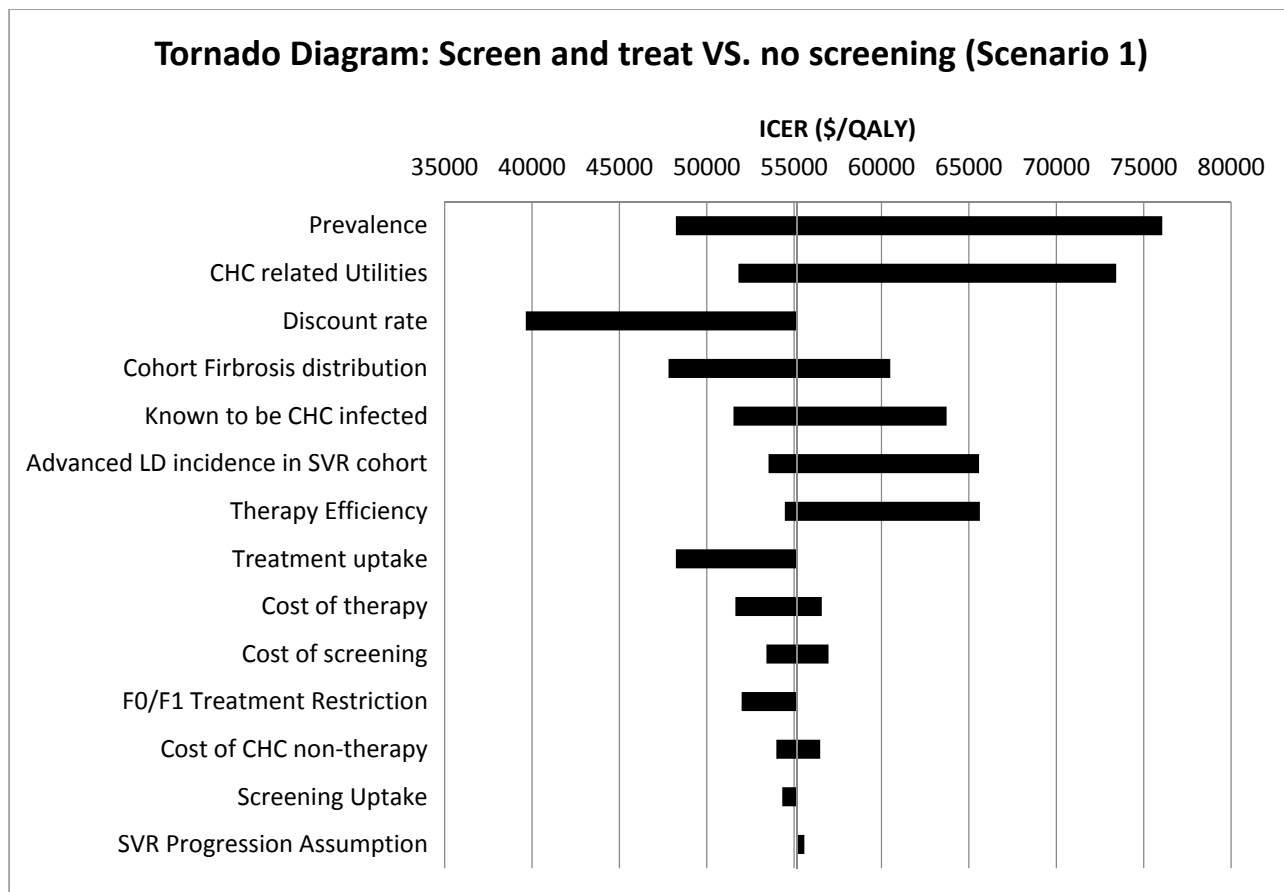

### Tornado Diagram: Screen and treat VS. no screening (Scenario 2)

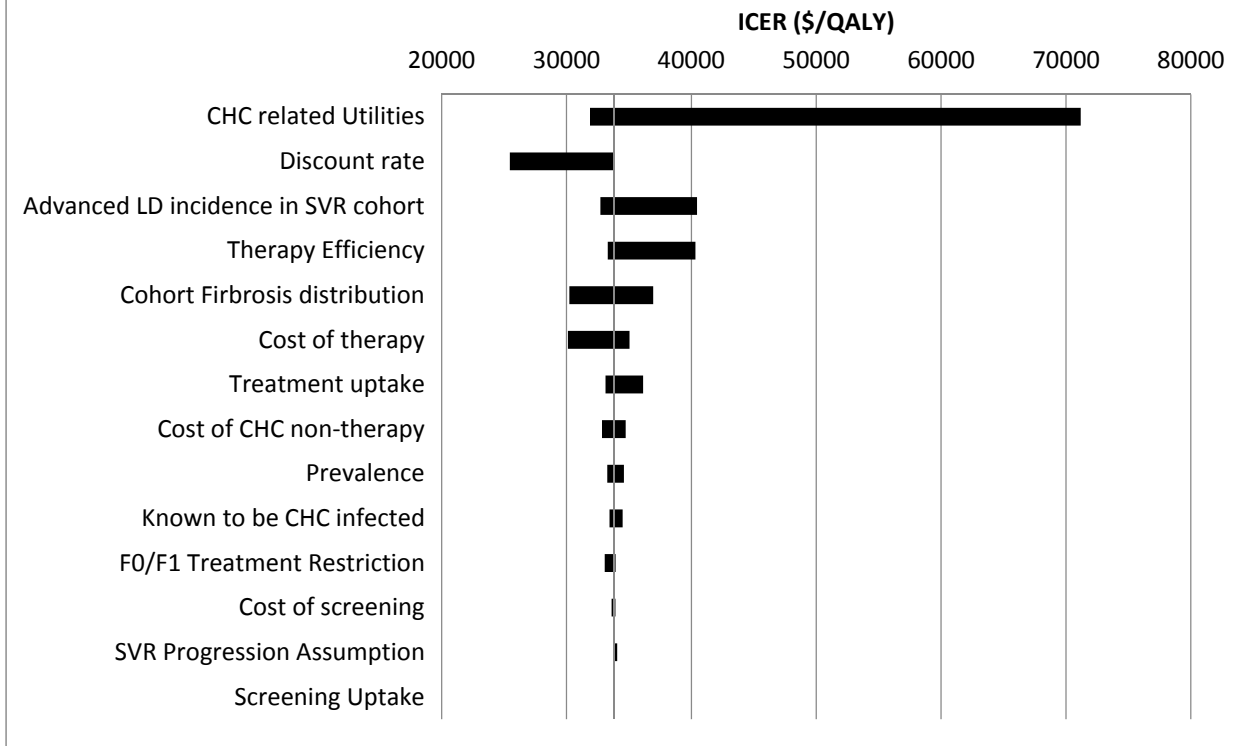

### Tornado Diagram: Screen and treat VS. no screening (Scenario 3)

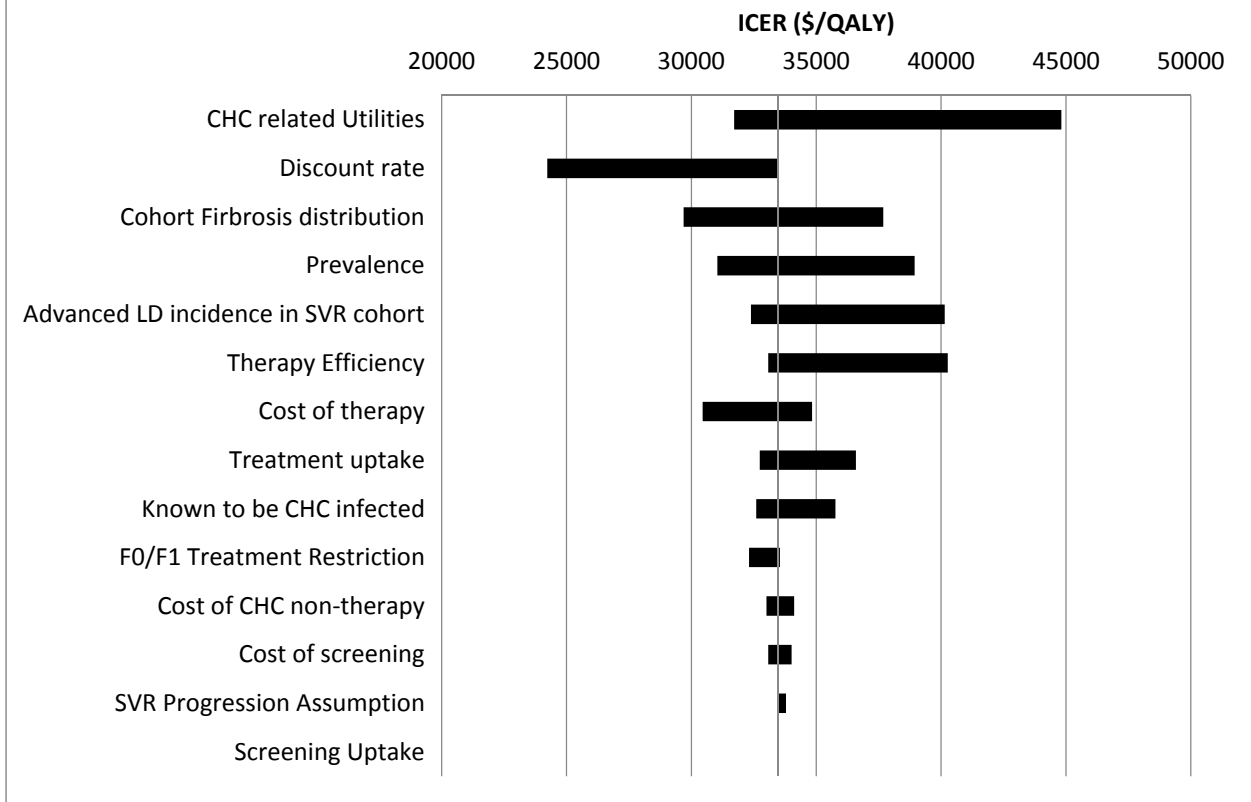

### Tornado Diagram: Screen and treat VS. no screening (Scenario 4)

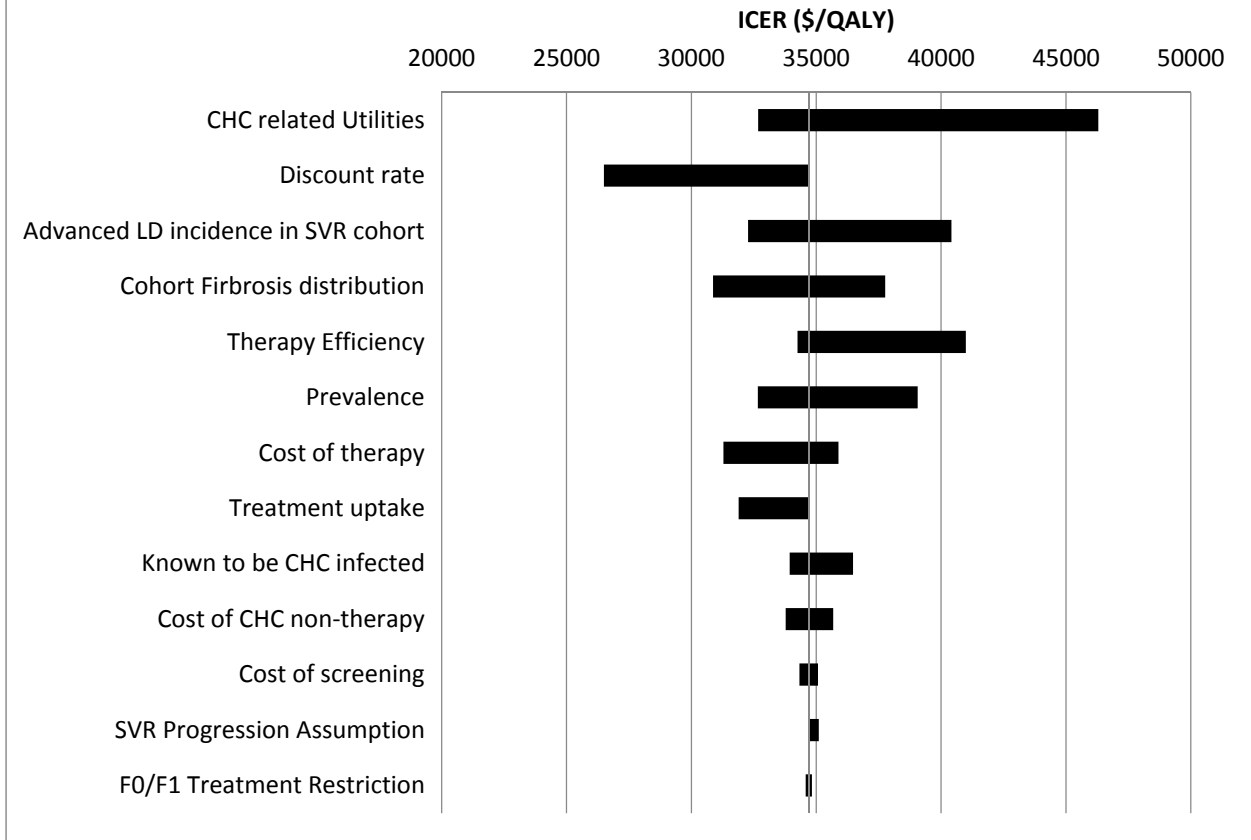

Supplement: supp_5.3.E662_2017-0048-at-2.pdf [file supp_5.3.E662_2017-0048-at-2.pdf]
